# Supplementary material
Source: PubMed Central journal article supplement (PMC5790127)
Supplement: blood801985-suppl1.pdf [file blood801985-suppl1.pdf]

# Supplementary Appendix

## Table of Contents

| Section                                                                                    | Page |
|--------------------------------------------------------------------------------------------|------|
| -----                                                                                      |      |
| Table S1 Targeted gene panel                                                               | 2    |
| Table S2 Clinical characteristics of patients with SCN or cyclic neutropenia               | 3    |
| Table S3 Clinical characteristics of patients with SDS                                     | 4    |
| Table S4 Hematopoietic progenitor clone somatic variants                                   | 5    |
| Table S5 Somatic variants associated with clonal hematopoiesis                             | 12   |
| Figure S1 Tissue origin has no consistent effect on the prevalence of clonal hematopoiesis | 15   |

Table S1. Targeted gene panel

---

|               |               |               |
|---------------|---------------|---------------|
| <i>ASXL1</i>  | <i>IDH1</i>   | <i>SF1</i>    |
| <i>ATM</i>    | <i>IDH2</i>   | <i>SF3B1</i>  |
| <i>ATRX</i>   | <i>JAK2</i>   | <i>SMC1A</i>  |
| <i>BCOR</i>   | <i>KDM6A</i>  | <i>SMC3</i>   |
| <i>BCORL1</i> | <i>KRAS</i>   | <i>SRCAP</i>  |
| <i>BRCC3</i>  | <i>LUC7L2</i> | <i>SRSF2</i>  |
| <i>CBL</i>    | <i>MYD88</i>  | <i>STAG2</i>  |
| <i>CEBPA</i>  | <i>NPM1</i>   | <i>STAT3</i>  |
| <i>CREBBP</i> | <i>NRAS</i>   | <i>TET2</i>   |
| <i>CSF3R</i>  | <i>PHF6</i>   | <i>TP53</i>   |
| <i>CUX1</i>   | <i>PPM1D</i>  | <i>U2AF1</i>  |
| <i>DNMT3A</i> | <i>PTPN11</i> | <i>ZBTB33</i> |
| <i>EZH2</i>   | <i>RAD21</i>  | <i>ZNF318</i> |
| <i>FLT3</i>   | <i>RUNX1</i>  | <i>ZRSR2</i>  |
| <i>GNAS</i>   | <i>SETBP1</i> |               |
| <i>GNB1</i>   | <i>SETD2</i>  |               |

---

**Table S2. Clinical characteristics of patients with SCN or cyclic neutropenia**

| Study ID | SCN or Cyclic | HPC       |          | Age (years) | Gender | ELANE Mutation  | Median G-CSF ( $\mu\text{g}/\text{kg}/\text{d}$ ) | ANC ( $\times 10^3/\mu\text{l}$ ) | MDS/AML (age in years) | BMT/death (age in years) | Tissue      |
|----------|---------------|-----------|----------|-------------|--------|-----------------|---------------------------------------------------|-----------------------------------|------------------------|--------------------------|-------------|
|          |               | Exome Seq |          |             |        |                 |                                                   |                                   |                        |                          |             |
| CN01     | Cyclic        | No        |          | 3           | M      | W241G           | NA                                                | NA                                | N                      |                          | Bone Marrow |
| CN03     | Cyclic        | No        |          | 30          | M      | V190_F199del    | 1                                                 | 0.2                               | N                      |                          | Blood       |
| CN08     | Cyclic        | No        |          | 31          | M      | S126L           | 3.6                                               | NA                                | N                      |                          | Bone Marrow |
| CN09     | Cyclic        | No        |          | 26          | M      | I60T            | 2.5                                               | NA                                | N                      |                          | Bone Marrow |
| CN10     | Cyclic        | No        |          | 17          | M      | Unknown         | 0.5                                               | 0.2                               | N                      |                          | Blood       |
| CN11     | Cyclic        | No        |          | 30          | M      | Unknown         | N/A                                               | N/A                               | N                      |                          | Blood       |
| CN12     | Cyclic        | No        |          | 47          | M      | Unknown         | 1.7                                               | N/A                               | N                      |                          | Blood       |
| CN13     | Cyclic        | No        |          | 33          | F      | Unknown         | N/A                                               | N/A                               | N                      |                          | Blood       |
| CN14     | Cyclic        | No        |          | 18          | M      | P139L           | 2.8                                               | 0.4                               | N                      |                          | Blood       |
| CN15     | Cyclic        | No        |          | 47          | M      | R220Q           | 0.15                                              | 1.521                             | N                      |                          | Bone Marrow |
| CN16     | Cyclic        | No        |          | 23          | F      | S126L           | 2.2                                               | NA                                | N                      | BMT (24)                 | Bone Marrow |
| CN17     | Cyclic        | No        |          | 3           | F      | S46F            | 5                                                 | 0.745                             | N                      |                          | Bone Marrow |
| CN18     | Cyclic        | No        |          | 11          | F      | IVS4+5 G>A      | 17                                                | NA                                | N                      |                          | Bone Marrow |
| SCN01    | SCN           | Yes       |          | 14          | F      | S126L           | 1.2                                               | 0.1                               | N                      |                          | Bone Marrow |
| SCN02    | SCN           | Yes       |          | 14          | F      | S126L           | 1.3                                               | 0                                 | N                      |                          | Bone Marrow |
| SCN03    | SCN           | Yes       |          | 7           | M      | V65F            | 12                                                | 0.1                               | N                      | BMT (13)                 | Bone Marrow |
| SCN04    | SCN           | Yes       |          | 6           | F      | IVS4+1 G>A      | NA                                                | NA                                | N                      |                          | Bone Marrow |
| SCN05    | SCN           | Yes       |          | 18          | M      | S126L           | 1.6                                               | 0                                 | N                      |                          | Bone Marrow |
| SCN06    | SCN           | Yes       |          | 18          | M      | S126L           | 0.8                                               | 0                                 | N                      |                          | Bone Marrow |
| SCN07    | SCN           | Yes       |          | 18          | F      | S126L           | 2.2                                               | 0                                 | N                      |                          | Bone Marrow |
| SCN11    | SCN           | Yes       |          | 21          | M      | Unknown         | 3.6                                               | 0                                 | N                      |                          | Bone Marrow |
| SCN12    | SCN           | Yes       |          | 16          | M      | R103L           | 2.4                                               | NA                                | N                      | BMT (16)                 | Bone Marrow |
| SCN13    | SCN           | Yes       |          | 15          | M      | S126L           | 2.1                                               | 0.3                               | N                      |                          | Bone Marrow |
| SCN14    | SCN           | No        |          | 11          | F      | C223X           | 15                                                | 0.175                             | N                      | Died (18)                | Bone Marrow |
| SCN15    | SCN           | No        |          | 10          | M      | Thr95_Ala100del | 7.4                                               | NA                                | N                      |                          | Bone Marrow |
| SCN18    | SCN           | No        |          | 1           | M      | G125R           | 0                                                 | 0.2                               | N                      |                          | Bone Marrow |
| SCN22    | SCN           | Yes       |          | 36          | F      | C194ter         | 12                                                | 0.06                              | AML (37)               |                          | Bone Marrow |
| SCN24    | SCN           | No        |          | 10          | F      | R81P            | 5.8                                               | 0.141                             | N                      |                          | Bone Marrow |
| SCN26    | SCN           | No        |          | 1           | M      | C55R            | 8.3                                               | 0.219                             | N                      |                          | Bone Marrow |
| SCN27    | SCN           | No        |          | 3           | F      | S126L           | 1.7                                               | 0.094                             | N                      |                          | Bone Marrow |
| SCN28    | SCN           | No        |          | 3           | F      | S126L           | 3.3                                               | 0.062                             | N                      |                          | Bone Marrow |
| SCN30    | SCN           | No        |          | 1           | M      | G203R           | 20.6                                              | 0.081                             | N                      | BMT (3)                  | Bone Marrow |
| SCN33    | SCN           | No        |          | 22          | F      | S126L           | 11.5                                              | 0.038                             | N                      |                          | Bone Marrow |
| SCN34    | SCN           | No        |          | 1           | F      | V101M           | 4.6                                               | 0                                 | N                      | BMT (6)                  | Bone Marrow |
| SCN35    | SCN           | No        |          | 1           | M      | G203R           | 183                                               | 0.445                             | N                      | BMT (2)                  | Bone Marrow |
| SCN36    | SCN           | No        |          | 1           | F      | A57T            | 53                                                | 0                                 | N                      | BMT (1)                  | Bone Marrow |
| SCN37    | SCN           | No        | 3 months |             | F      | C71S            | 18                                                | 0.347                             | N                      | BMT (6)                  | Bone Marrow |
| SCN38    | SCN           | No        |          | 14          | F      | S126W           | 2.5                                               | 0.059                             | N                      |                          | Bone Marrow |
| SCN39    | SCN           | No        |          | 13          | M      | I60T            | 19                                                | 0                                 | N                      |                          | Bone Marrow |
| SCN40    | SCN           | No        |          | 3           | F      | P139L           | 0.6                                               | 0.252                             | N                      |                          | Bone Marrow |
| SCN41    | SCN           | No        |          | 7           | F      | V45M            | 4.2                                               | 0.175                             | N                      |                          | Bone Marrow |
| SCN42    | SCN           | No        |          | 4           | F      | G221X           | 15                                                | 0.27                              | N                      |                          | Bone Marrow |
| SCN43    | SCN           | No        |          | 6           | M      | S126L           | 12                                                | 0.1                               | N                      |                          | Bone Marrow |
| SCN44    | SCN           | No        |          | 20          | M      | L84P            | 8.5                                               | 0.061                             | N                      |                          | Bone Marrow |
| SCN45    | SCN           | No        |          | 25          | F      | I129DEL         | 2.7                                               | 0                                 | N                      |                          | Bone Marrow |
| SCN46    | SCN           | No        |          | 6           | M      | I129DEL         | 1.8                                               | 0.305                             | N                      |                          | Bone Marrow |
| SCN47    | SCN           | No        |          | 2           | F      | Ins PQ123       | 22.5                                              | 0.124                             | N                      | BMT (2)                  | Bone Marrow |
| SCN48    | SCN           | No        |          | 32          | F      | M66R            | 3.4                                               | 0.648                             | N                      | Died (36)                | Bone Marrow |
| SCN49    | SCN           | No        |          | 2           | F      | G214R           | 15.4                                              | 0.069                             | N                      | BMT (8)                  | Bone Marrow |
| SCN50    | SCN           | No        |          | 10          | F      | S126L           | 5                                                 | 0                                 | N                      |                          | Bone Marrow |
| SCN51    | SCN           | No        |          | 45          | F      | S126L           | 5                                                 | 0.173                             | AML (56)               |                          | Bone Marrow |
| SCN52    | SCN           | No        |          | 15          | M      | S126L           | 6                                                 | 0.077                             | N                      |                          | Bone Marrow |
| SCN53    | SCN           | No        |          | 13          | M      | S126L           | 1.9                                               | 0.403                             | N                      |                          | Bone Marrow |

HPC: hematopoietic progenitor cells; ANC: absolute neutrophil count; MDS: myelodysplastic syndrome

AML: acute myeloid leukemia; BMT: bone marrow transplantation.

The age at the time the sample was collected is shown.

Samples in which exome sequencing was performed on expanded hematopoietic progenitors is indicated

**Table S3. Clinical characteristics of patients with SDS**

| Study ID | Exome Seq | Age (years) | Gender | SBDS Mutation                      | G-CSF | ANC (x 10 <sup>6</sup> ) | Hb (gm/dL) | Platelet (x 10 <sup>3</sup> ) | MDS/AML | Cytog Abnl | Tissue      |
|----------|-----------|-------------|--------|------------------------------------|-------|--------------------------|------------|-------------------------------|---------|------------|-------------|
| SDS16    | Yes       | 2           | F      | Homozygous IVS2+2 T>C              | No    | 0.33                     | 11.4       | 180                           | N       | N          | Bone Marrow |
| SDS35    | Yes       | 12          | M      | Homozygous 258+2T>C                | No    | 2.02                     | 11.9       | 117                           | N       | del20q     | Bone Marrow |
| SDS05    | No        | 12          | M      | 183-184CT>TA,258+2T>C              | Yes   | 2.4                      | 12.8       | 158                           | N       | del20q     | Bone Marrow |
| SDS06    | No        | 18          | M      | 183-184CT>TA,258+2T>C              | No    | 0.29                     | 15.9       | 150                           | N       | N          | Bone Marrow |
| SDS07    | No        | 19          | F      | 183-184CT>TA,258+2T>C              | Yes   | 0.78                     | 12.1       | 111                           | N       | N          | Bone Marrow |
| SDS08    | No        | 8           | M      | 183-184CT>TA,258+2T>C              | No    | 1.11                     | 13.4       | 233                           | N       | N          | Bone Marrow |
| SDS09    | No        | 5           | M      | 183-184CT>TA,258+2T>C              | No    | 0.77                     | 12.7       | 203                           | N       | N          | Bone Marrow |
| SDS10    | No        | 4           | M      | 183-184CT>TA,258+2T>C              | No    | 1.18                     | 11.3       | 141                           | N       | N          | Bone Marrow |
| SDS11    | No        | 11          | M      | 183-184CT>TA,258+2T>C              | Yes   | 3.24                     | 11.0       | 42                            | N       | N          | Bone Marrow |
| SDS12    | No        | 3           | F      | 183-184CT>TA,258+2T>C              | No    | 0.26                     | 12.0       | 209                           | N       | N          | Bone Marrow |
| SDS13    | No        | 11          | F      | 183-184CT>TA,258+2T>C              | Yes   | 2.54                     | 14.0       | 141                           | N       | N          | Bone Marrow |
| SDS15    | No        | 6           | M      | 183-184CT>TA,258+2T>C              | No    | 0.83                     | 13.0       | 171                           | N       | N          | Bone Marrow |
| SDS17    | No        | 10          | M      | 183-184CT>TA,258+2T>C              | Yes   | 1.78                     | 11.5       | 197                           | N       | N          | Blood       |
| SDS18    | No        | 3           | F      | 183-184CT>TA,258+2T>C              | No    | 1.66                     | 11.6       | 130                           | N       | N          | Blood       |
| SDS19    | No        | 13          | M      | 183-184CT>TA,258+2T>C              | No    | 0.25                     | 12.2       | 90                            | N       | N          | Blood       |
| SDS20    | No        | 6           | F      | 183-184CT>TA,258+2T>C              | Yes   | 0.38                     | 12.6       | 145                           | N       | N          | Blood       |
| SDS21    | No        | 5           | F      | 183-184CT>TA,258+2T>C              | No    | 4.49                     | 12.9       | 224                           | N       | N          | Blood       |
| SDS22    | No        | 8           | M      | 183-184CT>TA,258+2T>C              | No    | 1.03                     | 12.5       | 134                           | N       | N          | Blood       |
| SDS23    | No        | 9           | M      | 183-184CT>TA,258+2T>C              | NA    | 0.62                     | 12.4       | 72                            | N       | N          | Blood       |
| SDS24    | No        | 5           | M      | 183-184CT>TA,258+2T>C              | NA    | 0.40                     | 11.7       | 234                           | N       | N          | Blood       |
| SDS25    | No        | 10          | M      | 183-184CT>TA,258+2T>C              | No    | 1.98                     | 13.3       | 96                            | N       | N          | Blood       |
| SDS28    | No        | 2           | M      | 183_184TA>CT; 258+2T>C             | Yes   | 0.00                     | 7.3        | 112                           | N       | N          | Bone Marrow |
| SDS29    | No        | 1           | M      | 183_184TA>CT+258_2T>C; 258+2T>C    | Yes   | 0.00                     | 11.1       | 418                           | N       | N          | Bone Marrow |
| SDS30    | No        | 2           | F      | 258+2T>C; 613C>T (p.Q205*)         | Yes   | 0.28                     | 11.2       | 225                           | N       | N          | Bone Marrow |
| SDS31    | No        | 16          | F      | 183_184TA>CT; 258+2T>C             | Yes   | 0.37                     | 12.2       | 176                           | N       | N          | Bone Marrow |
| SDS32    | No        | 5           | F      | 183_184TA>CT; 258+2T>C             | No    | 1.03                     | 11.8       | 158                           | N       | N          | Bone Marrow |
| SDS33    | No        | 14          | M      | 183_184TA>CT; 258+2T>C             | No    | 0.47                     | 11.0       | 319                           | N       | N          | Bone Marrow |
| SDS34    | No        | 6           | F      | 98A>C (p.K33T); structural variant | No    | 0.70                     | 10.0       | 121                           | N       | N          | Bone Marrow |

HPC: hematopoietic progenitor cell; ANC: absolute neutrophil count; MDS: myelodysplastic syndrome; AML: acute myeloid leukemia

Cytog abnl: cytogenetic abnormality

Table S4. Hematopoietic progenitor clone somatic variants

| Sample | HPC Clone |     | start     | stop      | Ref  | Var  | type | Gene     | Mutation type         | cDNA position | amino acid change       | WBC | WBC | WBC   | HPC   | HPC   | HPC   |
|--------|-----------|-----|-----------|-----------|------|------|------|----------|-----------------------|---------------|-------------------------|-----|-----|-------|-------|-------|-------|
|        | #         | Chr |           |           |      |      |      |          |                       |               |                         | ref | var | count | count | count | count |
| Cord01 | 1         | 3   | 10102079  | 10102079  | G    | A    | SNP  | FANCD2   | missense              | c.257         | p.R86Q                  | 107 | 0   | 0     | 36    | 46    | 54.76 |
| Cord01 | 1         | 16  | 56509438  | 56509438  | C    | T    | SNP  | OGFOD1   | silent                | c.1428        | p.G476                  | 169 | 0   | 0     | 83    | 74    | 45.68 |
| Cord01 | 2         | 5   | 73179614  | 73179614  | C    | T    | SNP  | ARHGEF28 | missense              | c.2960        | p.A987V                 | 152 | 0   | 0     | 68    | 58    | 44.62 |
| Cord01 | 3         | 16  | 89661953  | 89661953  | G    | A    | SNP  | CPNE7    | missense              | c.1706        | p.R569Q                 | 90  | 0   | 0     | 64    | 61    | 46.56 |
| Cord01 | 4         | 10  | 97402772  | 97402772  | G    | A    | SNP  | ALDH18A1 | missense              | c.280         | p.R94C                  | 37  | 0   | 0     | 13    | 18    | 58.06 |
| Cord02 | 3         | 5   | 121188197 | 121188197 | T    | C    | SNP  | FTMT     | missense              | c.539         | p.L180P                 | 64  | 0   | 0     | 16    | 31    | 64.58 |
| Cord02 | 3         | 11  | 5530122   | 5530122   | A    | T    | SNP  | UBQLN3   | missense              | c.667         | p.F223I                 | 50  | 0   | 0     | 17    | 19    | 47.5  |
| Cord02 | 4         | 16  | 84907569  | 84907569  | G    | A    | SNP  | CRISPLD2 | missense              | c.1156        | p.V386M                 | 79  | 1   | 1.19  | 49    | 44    | 47.31 |
| Cord02 | 4         | 7   | 107710283 | 107710283 | C    | T    | SNP  | LAMB4    | silent                | c.2172        | p.K724                  | 61  | 0   | 0     | 40    | 22    | 33.85 |
| Cord02 | 4         | 15  | 59466007  | 59466007  | C    | T    | SNP  | MYO1E    | missense              | c.2272        | p.V758M                 | 62  | 0   | 0     | 32    | 29    | 46.77 |
| Cord03 | 1         | 10  | 37441037  | 37441037  | T    | G    | SNP  | ANKRD30A | silent                | c.1527        | p.S509                  | 179 | 3   | 1.6   | 65    | 86    | 54.78 |
| Cord03 | 1         | 22  | 28194881  | 28194883  | GCT  | -    | DEL  | MN1      | in_frame_deletion     | c.1651_1649   | p.Q550in_frame_deletion | 34  | 1   | 2.86  | 23    | 7     | 23.33 |
| Cord03 | 1         | 1   | 158607931 | 158607931 | C    | T    | SNP  | SPTA1    | missense              | c.5081        | p.R1694H                | 89  | 0   | 0     | 39    | 40    | 49.38 |
| Cord03 | 3         | 14  | 60585194  | 60585194  | G    | A    | SNP  | PCNXL4   | missense              | c.1726        | p.V576M                 | 173 | 2   | 1.13  | 44    | 45    | 49.45 |
| Cord03 | 4         | 16  | 23535662  | 23535662  | G    | A    | SNP  | EARS2    | rna                   | NULL          | NULL                    | 77  | 0   | 0     | 44    | 67    | 60.36 |
| Cord03 | 4         | 1   | 70303967  | 70303967  | G    | T    | SNP  | LRRC7    | splice_site           | c.533+1       | e5+1                    | 125 | 0   | 0     | 81    | 76    | 47.8  |
| Cord03 | 4         | 11  | 102667861 | 102667861 | G    | C    | SNP  | MMP1     | missense              | c.383         | p.A128G                 | 87  | 0   | 0     | 57    | 44    | 38.94 |
| NM01   | 1         | 3   | 62478113  | 62478113  | C    | T    | SNP  | CADPS    | missense              | c.643         | p.V215M                 | 80  | 0   | 0     | 24    | 24    | 50    |
| NM01   | 1         | 19  | 19338712  | 19338712  | C    | T    | SNP  | NCAN     | silent                | c.2283        | p.F761                  | 51  | 0   | 0     | 21    | 20    | 48.78 |
| NM01   | 1         | 11  | 4936626   | 4936626   | A    | C    | SNP  | OR51G2   | missense              | c.268         | p.F90V                  | 46  | 0   | 0     | 13    | 21    | 61.76 |
| NM01   | 1         | 19  | 3643312   | 3643312   | C    | T    | SNP  | PIP5K1C  | silent                | c.1578        | p.T526                  | 110 | 0   | 0     | 22    | 35    | 61.4  |
| NM01   | 1         | 18  | 9887456   | 9887456   | G    | T    | SNP  | TXNDC2   | missense              | c.980         | p.G327V                 | 68  | 1   | 1.43  | 40    | 31    | 41.33 |
| NM01   | 2         | 16  | 88873773  | 88873776  | CTGC | -    | DEL  | CDT1     | frame_shift_deletion  | c.1360_1363   | p.P455fs                | 52  | 0   | 0     | 20    | 18    | 47.37 |
| NM01   | 2         | 7   | 74004235  | 74004235  | G    | A    | SNP  | GTF2IRD1 | missense              | c.508         | p.G170R                 | 53  | 1   | 1.85  | 37    | 38    | 50.67 |
| NM01   | 2         | 9   | 91965660  | 91965661  | -    | TAAA | INS  | SECISBP2 | frame_shift_insertion | c.2006_2007   | p.R671fs                | 110 | 0   | 0     | 62    | 44    | 41.51 |
| NM01   | 3         | 17  | 79517302  | 79517302  | C    | T    | SNP  | C17orf70 | silent                | c.1218        | p.S406                  | 49  | 0   | 0     | 5     | 16    | 76.19 |
| NM01   | 3         | 19  | 41633855  | 41633856  | -    | T    | INS  | CYP2F1   | frame_shift_insertion | c.1344_1345   | p.Y448fs                | 74  | 0   | 0     | 16    | 15    | 48.39 |
| NM01   | 3         | 20  | 26061845  | 26061845  | T    | A    | SNP  | FAM182A  | rna                   | NULL          | NULL                    | 74  | 1   | 1.33  | 12    | 7     | 36.84 |
| NM01   | 4         | 4   | 83978461  | 83978461  | A    | T    | SNP  | COPS4    | silent                | c.615         | p.A205                  | 52  | 0   | 0     | 62    | 84    | 54.9  |
| NM01   | 4         | 20  | 37653945  | 37653945  | A    | G    | SNP  | DHX35    | missense              | c.1744        | p.R582G                 | 90  | 0   | 0     | 80    | 89    | 50    |
| NM01   | 4         | 9   | 136570105 | 136570105 | G    | T    | SNP  | SARDH    | silent                | c.1519        | p.R507                  | 203 | 1   | 0.49  | 132   | 135   | 48.74 |
| NM02   | 1         | 2   | 208434919 | 208434919 | T    | A    | SNP  | CREB1    | missense              | c.421         | p.L141I                 | 84  | 0   | 0     | 70    | 75    | 50.68 |
| NM02   | 2         | 11  | 83770418  | 83770418  | G    | A    | SNP  | DLG2     | missense              | c.859         | p.R287C                 | 59  | 0   | 0     | 47    | 40    | 45.98 |
| NM02   | 2         | 11  | 17631829  | 17631829  | C    | T    | SNP  | OTOG     | missense              | c.5018        | p.S1673L                | 42  | 0   | 0     | 27    | 31    | 51.67 |
| NM02   | 2         | 2   | 220163827 | 220163827 | A    | T    | SNP  | PTPRN    | missense              | c.1610        | p.V537E                 | 49  | 1   | 2     | 27    | 24    | 46.15 |
| NM02   | 2         | 22  | 25297913  | 25297913  | C    | T    | SNP  | SGSM1    | silent                | c.2889        | p.N963                  | 46  | 0   | 0     | 16    | 11    | 39.29 |
| NM02   | 3         | 19  | 3905613   | 3905613   | G    | C    | SNP  | ATCAY    | silent                | c.318         | p.S106                  | 116 | 0   | 0     | 56    | 45    | 44.12 |

|      |   |    |           |           |     |   |     |                     |          |        |          |     |   |      |     |     |       |
|------|---|----|-----------|-----------|-----|---|-----|---------------------|----------|--------|----------|-----|---|------|-----|-----|-------|
| NM02 | 3 | 7  | 71252771  | 71252771  | C   | T | SNP | CALN1               | missense | c.775  | p.G259S  | 53  | 0 | 0    | 26  | 16  | 38.1  |
| NM02 | 3 | 12 | 56489515  | 56489515  | C   | A | SNP | ERBB3               | silent   | c.1980 | p.G660   | 81  | 0 | 0    | 41  | 40  | 49.38 |
| NM02 | 3 | 18 | 34324149  | 34324149  | C   | T | SNP | FHOD3               | nonsense | c.559  | p.Q187*  | 63  | 0 | 0    | 26  | 24  | 48    |
| NM02 | 3 | 16 | 47941192  | 47941192  | G   | A | SNP | LOC101927<br>132    | rna      | NULL   | NULL     | 41  | 0 | 0    | 29  | 41  | 58.57 |
| NM02 | 3 | 17 | 1386202   | 1386202   | C   | T | SNP | MYO1C               | missense | c.499  | p.G167R  | 51  | 0 | 0    | 21  | 22  | 51.16 |
| NM02 | 3 | 6  | 160864668 | 160864668 | C   | T | SNP | SLC22A3             | silent   | c.1407 | p.F469   | 48  | 0 | 0    | 40  | 26  | 38.81 |
| NM02 | 3 | 10 | 106974293 | 106974293 | C   | T | SNP | SORCS3              | silent   | c.2469 | p.G823   | 75  | 0 | 0    | 30  | 27  | 44.26 |
| NM02 | 3 | 17 | 49075878  | 49075878  | C   | T | SNP | SPAG9               | missense | c.1765 | p.V589I  | 104 | 0 | 0    | 65  | 47  | 41.96 |
| NM02 | 4 | 15 | 78401634  | 78401634  | C   | G | SNP | CIB2                | missense | c.289  | p.V97L   | 149 | 0 | 0    | 132 | 151 | 52.8  |
| NM02 | 4 | 7  | 121636544 | 121636544 | T   | C | SNP | PTPRZ1              | missense | c.1037 | p.F346S  | 103 | 1 | 0.96 | 75  | 80  | 51.28 |
| NM03 | 1 | 10 | 105236269 | 105236269 | C   | T | SNP | CALHM3              | missense | c.325  | p.A109T  | 69  | 0 | 0    | 46  | 48  | 49.48 |
| NM03 | 1 | 3  | 58134511  | 58134511  | A   | G | SNP | FLNB                | missense | c.6023 | p.Y2008C | 60  | 0 | 0    | 45  | 44  | 48.35 |
| NM03 | 1 | 11 | 68115353  | 68115353  | C   | T | SNP | LRP5                | missense | c.130  | p.R44W   | 56  | 0 | 0    | 41  | 58  | 56.31 |
| NM03 | 1 | 6  | 138417567 | 138417567 | G   | A | SNP | PERP                | silent   | c.279  | p.I93    | 52  | 0 | 0    | 43  | 52  | 51.49 |
| NM03 | 2 | 16 | 27556779  | 27556779  | T   | A | SNP | GTF3C1              | missense | c.287  | p.D96V   | 54  | 0 | 0    | 50  | 49  | 47.12 |
| NM03 | 2 | 5  | 140348339 | 140348339 | G   | A | SNP | PCDHAC2             | missense | c.1988 | p.R663Q  | 77  | 0 | 0    | 109 | 77  | 40.31 |
| NM03 | 2 | 6  | 4060872   | 4060872   | G   | C | SNP | PRPF4B              | rna      | NULL   | NULL     | 102 | 0 | 0    | 79  | 77  | 47.53 |
| NM03 | 3 | 1  | 159166757 | 159166757 | C   | T | SNP | CADM3               | missense | c.961  | p.P321S  | 50  | 0 | 0    | 76  | 67  | 46.53 |
| NM03 | 3 | 5  | 176018323 | 176018323 | C   | T | SNP | CDHR2               | nonsense | c.3652 | p.R1218* | 68  | 0 | 0    | 50  | 50  | 47.62 |
| NM03 | 3 | 2  | 201853137 | 201853137 | T   | C | SNP | FAM126B             | missense | c.839  | p.N280S  | 77  | 0 | 0    | 100 | 97  | 47.32 |
| NM03 | 3 | 9  | 133805003 | 133805003 | A   | T | SNP | FIBCD1              | missense | c.503  | p.L168Q  | 36  | 0 | 0    | 58  | 49  | 44.95 |
| NM03 | 3 | 5  | 153056597 | 153056597 | A   | G | SNP | GRIA1               | missense | c.935  | p.E312G  | 81  | 0 | 0    | 98  | 80  | 43.24 |
| NM03 | 3 | 13 | 101763031 | 101763031 | C   | T | SNP | NALCN               | missense | c.2303 | p.R768K  | 71  | 0 | 0    | 62  | 44  | 40    |
| NM03 | 3 | 1  | 111931880 | 111931880 | T   | C | SNP | PGCP1               | rna      | NULL   | NULL     | 120 | 0 | 0    | 143 | 117 | 44.15 |
| NM03 | 3 | 12 | 42859012  | 42859012  | G   | A | SNP | PRICKLE1            | missense | c.824  | p.T275M  | 61  | 1 | 1.61 | 75  | 71  | 47.02 |
| NM03 | 3 | 4  | 184605112 | 184605112 | G   | A | SNP | TRAPPC11            | missense | c.10   | p.V4I    | 68  | 0 | 0    | 74  | 78  | 49.06 |
| NM03 | 4 | 11 | 75139508  | 75139508  | G   | C | SNP | KLHL35              | missense | c.1045 | p.R349G  | 87  | 0 | 0    | 48  | 59  | 53.64 |
| NM03 | 4 | 6  | 167755081 | 167755081 | G   | A | SNP | TTLL2               | missense | c.1693 | p.A565T  | 56  | 0 | 0    | 28  | 27  | 45.76 |
| NM04 | 1 | 9  | 114423923 | 114423923 | C   | T | SNP | GNG10               | silent   | c.9    | p.S3     | 183 | 0 | 0    | 79  | 70  | 46.36 |
| NM04 | 1 | 15 | 88420309  | 88420309  | G   | A | SNP | NTRK3               | nonsense | c.2377 | p.R793*  | 32  | 0 | 0    | 34  | 24  | 41.38 |
| NM04 | 1 | 5  | 95735831  | 95735831  | G   | A | SNP | PCSK1               | missense | c.1256 | p.P419L  | 34  | 0 | 0    | 15  | 17  | 53.12 |
| NM04 | 1 | 12 | 107155008 | 107155008 | C   | A | SNP | RFX4                | missense | c.1996 | p.P666T  | 63  | 0 | 0    | 34  | 23  | 40.35 |
| NM04 | 1 | 1  | 45116726  | 45116728  | GGG | - | DEL | RNF220              | rna      | NULL   | NULL     | 74  | 0 | 0    | 43  | 24  | 35.82 |
| NM04 | 2 | 6  | 151672215 | 151672215 | G   | A | SNP | AKAP12              | missense | c.2689 | p.A897T  | 46  | 1 | 2.13 | 34  | 35  | 49.3  |
| NM04 | 2 | 2  | 217735635 | 217735635 | T   | C | SNP | ENSG00000<br>223874 | silent   | c.66   | p.C22    | 95  | 0 | 0    | 42  | 47  | 50.54 |
| NM04 | 2 | 8  | 61471448  | 61471448  | C   | A | SNP | RAB2A               | missense | c.84   | p.D28E   | 35  | 0 | 0    | 41  | 26  | 37.68 |
| NM04 | 2 | 17 | 3352408   | 3352408   | G   | A | SNP | SPATA22             | missense | c.365  | p.T122I  | 99  | 1 | 0.98 | 85  | 93  | 51.1  |
| NM04 | 2 | 15 | 85113954  | 85113954  | G   | A | SNP | UBE2Q2P1            | rna      | NULL   | NULL     | 157 | 0 | 0    | 73  | 66  | 44.9  |
| NM04 | 3 | 10 | 50530617  | 50530617  | A   | T | SNP | C10orf71            | silent   | c.27   | p.T9     | 64  | 2 | 2.99 | 39  | 41  | 50.62 |
| NM04 | 3 | 14 | 37117121  | 37117121  | C   | A | SNP | ENSG00000<br>258661 | rna      | NULL   | NULL     | 111 | 0 | 0    | 93  | 95  | 48.72 |
| NM04 | 3 | 21 | 19698860  | 19698860  | C   | G | SNP | TMPRSS15            | missense | c.1810 | p.D604H  | 97  | 0 | 0    | 74  | 60  | 42.25 |
| NM04 | 4 | 5  | 7690959   | 7690959   | C   | T | SNP | ADCY2               | rna      | NULL   | NULL     | 50  | 0 | 0    | 34  | 39  | 53.42 |

|       |   |    |           |           |                      |   |     |                     |                     |        |          |     |   |      |     |     |       |
|-------|---|----|-----------|-----------|----------------------|---|-----|---------------------|---------------------|--------|----------|-----|---|------|-----|-----|-------|
| NM04  | 4 | 17 | 39633313  | 39633313  | A                    | T | SNP | KRT35               | missense            | c.1363 | p.F455I  | 128 | 1 | 0.78 | 98  | 109 | 52.15 |
| NM04  | 4 | 16 | 2820440   | 2820440   | C                    | G | SNP | SRRM2               | missense            | c.85   | p.P29A   | 158 | 0 | 0    | 103 | 104 | 49.29 |
| NM05  | 1 | 10 | 72434740  | 72434740  | T                    | C | SNP | ADAMTS14            | missense            | c.511  | p.C171R  | 36  | 0 | 0    | 32  | 32  | 50    |
| NM05  | 1 | 9  | 139701454 | 139701454 | C                    | T | SNP | KIAA1984            | silent              | c.1422 | p.S474   | 79  | 0 | 0    | 33  | 22  | 40    |
| NM05  | 1 | 1  | 200562799 | 200562799 | C                    | T | SNP | KIF14               | missense            | c.2648 | p.R883H  | 62  | 0 | 0    | 47  | 33  | 41.25 |
| NM05  | 1 | 17 | 39156101  | 39156101  | T                    | C | SNP | KRTAP3-2            | missense            | c.5    | p.D2G    | 90  | 0 | 0    | 54  | 48  | 47.06 |
| NM05  | 1 | 4  | 39290347  | 39290347  | A                    | - | DEL | RFC1                | rna                 | NULL   | NULL     | 65  | 0 | 0    | 64  | 36  | 36    |
| NM05  | 1 | 12 | 118469011 | 118469011 | C                    | T | SNP | RFC5                | silent              | c.951  | p.N317   | 49  | 0 | 0    | 35  | 41  | 53.25 |
| NM05  | 1 | 19 | 52570086  | 52570086  | C                    | T | SNP | ZNF841              | missense            | c.1049 | p.C350Y  | 85  | 0 | 0    | 55  | 40  | 42.11 |
| NM05  | 2 | 12 | 92814833  | 92814833  | G                    | T | SNP | CLUU1OS             | missense            | c.259  | p.H87N   | 43  | 0 | 0    | 31  | 51  | 62.2  |
| NM05  | 2 | 21 | 33371202  | 33371202  | C                    | A | SNP | HUNK                | missense            | c.1850 | p.P617Q  | 40  | 0 | 0    | 35  | 24  | 40.68 |
| NM05  | 2 | 11 | 55579055  | 55579055  | C                    | T | SNP | OR5L1               | missense            | c.113  | p.T38M   | 75  | 0 | 0    | 54  | 45  | 45    |
| NM05  | 2 | 6  | 158924155 | 158924155 | A                    | T | SNP | TULP4               | missense            | c.3460 | p.M1154L | 70  | 0 | 0    | 16  | 10  | 38.46 |
| NM05  | 3 | 5  | 1216788   | 1216788   | G                    | A | SNP | SLC6A19             | missense            | c.1003 | p.D335N  | 50  | 0 | 0    | 21  | 35  | 61.4  |
| NM05  | 3 | 3  | 33255452  | 33255452  | G                    | T | SNP | SUSD5               | nonsense            | c.258  | p.C86*   | 41  | 0 | 0    | 18  | 30  | 62.5  |
| NM05  | 3 | 6  | 132892416 | 132892416 | G                    | - | DEL | TAAR6               | frame_shift<br>_del | c.956  | p.A321fs | 53  | 0 | 0    | 32  | 24  | 42.86 |
| NM05  | 4 | 15 | 51233728  | 51233728  | G                    | A | SNP | AP4E1               | missense            | c.1033 | p.V345I  | 91  | 0 | 0    | 86  | 80  | 47.9  |
| NM06  | 1 | 7  | 75615063  | 75615063  | G                    | T | SNP | POR                 | missense            | c.1565 | p.R522L  | 101 | 0 | 0    | 72  | 49  | 40.16 |
| NM06  | 1 | X  | 102192455 | 102192455 | C                    | T | SNP | RAB40AL             | missense            | c.209  | p.T70M   | 92  | 1 | 1.08 | 58  | 46  | 44.23 |
| NM06  | 2 | 16 | 77469935  | 77469946  | GTGT<br>GTGT<br>GTGG | - | DEL | ENSG00000<br>216131 | rna                 | NULL   | NULL     | 46  | 0 | 0    | 18  | 6   | 25    |
| NM06  | 2 | 17 | 45377915  | 45377915  | G                    | A | SNP | ITGB3               | missense            | c.1985 | p.R662H  | 107 | 0 | 0    | 52  | 49  | 48.04 |
| NM06  | 3 | 14 | 78353575  | 78353575  | G                    | A | SNP | ADCK1               | missense            | c.565  | p.D189N  | 44  | 0 | 0    | 28  | 26  | 47.27 |
| NM06  | 3 | 1  | 225492743 | 225492743 | C                    | T | SNP | DNAH14              | missense            | c.8678 | p.T2893I | 87  | 0 | 0    | 50  | 55  | 52.38 |
| NM06  | 3 | 5  | 158125661 | 158125661 | T                    | A | SNP | EBF1                | rna                 | NULL   | NULL     | 35  | 1 | 2.78 | 12  | 6   | 33.33 |
| NM06  | 3 | 19 | 5831554   | 5831554   | T                    | C | SNP | FUT6                | missense            | c.1025 | p.K342R  | 120 | 0 | 0    | 64  | 48  | 42.86 |
| NM06  | 3 | 17 | 58040517  | 58040517  | C                    | G | SNP | RNFT1               | missense            | c.185  | p.C62S   | 70  | 0 | 0    | 25  | 28  | 52.83 |
| NM06  | 3 | 19 | 41094601  | 41094601  | G                    | A | SNP | SHKBP1              | missense            | c.1408 | p.G470S  | 69  | 1 | 1.41 | 33  | 24  | 42.11 |
| NM06  | 3 | 1  | 214503563 | 214503563 | G                    | A | SNP | SMYD2               | missense            | c.758  | p.R253Q  | 94  | 0 | 0    | 46  | 57  | 54.81 |
| NM06  | 3 | 7  | 63537961  | 63537961  | T                    | G | SNP | ZNF727              | missense            | c.534  | p.C178W  | 37  | 0 | 0    | 10  | 27  | 72.97 |
| NM06  | 4 | 16 | 1412110   | 1412110   | G                    | A | SNP | GNPTG               | missense            | c.389  | p.R130H  | 43  | 0 | 0    | 29  | 23  | 44.23 |
| NM06  | 4 | 14 | 55518404  | 55518404  | G                    | A | SNP | MAPK1IP1L           | rna                 | NULL   | NULL     | 59  | 1 | 1.67 | 42  | 33  | 43.42 |
| SCN01 | 1 | 14 | 94725661  | 94725661  | G                    | T | SNP | PPP4R4              | missense            | c.2082 | p.L694F  | 66  | 0 | 0    | 36  | 23  | 36.51 |
| SCN01 | 2 | 20 | 60912720  | 60912720  | C                    | T | SNP | LAMA5               | missense            | c.2090 | p.S697N  | 59  | 0 | 0    | 39  | 39  | 48.15 |
| SCN01 | 2 | 10 | 21157652  | 21157652  | C                    | T | SNP | NEBL                | missense            | c.625  | p.A209T  | 39  | 0 | 0    | 42  | 49  | 51.58 |
| SCN01 | 2 | 12 | 3389626   | 3389626   | G                    | T | SNP | TSPAN9              | missense            | c.409  | p.A137S  | 32  | 0 | 0    | 20  | 6   | 22.22 |
| SCN01 | 3 | 17 | 61584467  | 61584467  | C                    | T | SNP | ACE                 | nonsense            | c.2020 | p.Q674*  | 44  | 0 | 0    | 49  | 51  | 50.5  |
| SCN01 | 3 | 5  | 149011589 | 149011589 | G                    | A | SNP | ARHGEF37            | silent              | c.1863 | p.V621   | 47  | 0 | 0    | 78  | 69  | 45.39 |
| SCN01 | 3 | 22 | 40037034  | 40037034  | C                    | T | SNP | CACNA1I             | silent              | c.903  | p.Y301   | 35  | 0 | 0    | 47  | 43  | 46.74 |
| SCN01 | 3 | 2  | 9568934   | 9568934   | G                    | A | SNP | CPSF3               | missense            | c.91   | p.E31K   | 111 | 1 | 0.88 | 144 | 121 | 43.84 |
| SCN01 | 3 | 6  | 97247041  | 97247041  | C                    | G | SNP | GPR63               | missense            | c.567  | p.K189N  | 34  | 0 | 0    | 59  | 38  | 38.78 |
| SCN01 | 3 | 1  | 37337837  | 37337837  | G                    | A | SNP | GRIK3               | silent              | c.684  | p.R228   | 34  | 0 | 0    | 38  | 31  | 43.66 |

|       |   |    |           |           |     |   |     |                  |                     |           |                            |     |   |      |    |     |       |
|-------|---|----|-----------|-----------|-----|---|-----|------------------|---------------------|-----------|----------------------------|-----|---|------|----|-----|-------|
| SCN01 | 3 | 16 | 11570754  | 11570754  | C   | T | SNP | LOC101929<br>274 | silent              | c.2493    | p.G831                     | 56  | 0 | 0    | 45 | 40  | 46.51 |
| SCN01 | 3 | 22 | 38470364  | 38470364  | C   | A | SNP | PICK1            | silent              | c.885     | p.R295                     | 68  | 0 | 0    | 61 | 78  | 54.55 |
| SCN02 | 1 | 2  | 27800163  | 27800163  | C   | T | SNP | C2orf16          | missense            | c.724     | p.R242W                    | 61  | 1 | 1.56 | 28 | 18  | 39.13 |
| SCN02 | 1 | 17 | 78175584  | 78175584  | G   | A | SNP | CARD14           | silent              | c.1893    | p.L631                     | 101 | 0 | 0    | 49 | 44  | 46.81 |
| SCN02 | 1 | 14 | 100375781 | 100375781 | G   | A | SNP | EML1             | missense            | c.1261    | p.G421R                    | 80  | 0 | 0    | 23 | 44  | 61.97 |
| SCN02 | 1 | 1  | 155209460 | 155209460 | G   | A | SNP | GBA              | missense            | c.401     | p.A134V                    | 79  | 1 | 1.16 | 27 | 26  | 47.27 |
| SCN02 | 1 | 9  | 115480348 | 115480348 | T   | C | SNP | INIP             | rna                 | NULL      | NULL                       | 145 | 2 | 1.27 | 55 | 56  | 48.7  |
| SCN02 | 1 | 14 | 23884612  | 23884612  | T   | A | SNP | MYH7             | missense            | c.5261    | p.K1754M                   | 62  | 0 | 0    | 23 | 27  | 50.94 |
| SCN02 | 1 | 2  | 179528826 | 179528826 | C   | A | SNP | TTN              | splice_site         | c.36281-1 | e168-1                     | 63  | 1 | 1.52 | 37 | 21  | 32.31 |
| SCN02 | 3 | 4  | 114274853 | 114274853 | G   | A | SNP | ANK2             | silent              | c.5079    | p.Q1693                    | 36  | 1 | 2.7  | 26 | 21  | 42.86 |
| SCN02 | 4 | 21 | 28296460  | 28296460  | C   | T | SNP | ADAMTS5          | missense            | c.2705    | p.C902Y                    | 44  | 0 | 0    | 14 | 9   | 39.13 |
| SCN02 | 4 | 10 | 111879261 | 111879261 | G   | A | SNP | ADD3             | missense            | c.899     | p.G300E                    | 144 | 0 | 0    | 43 | 65  | 60.19 |
| SCN02 | 4 | 9  | 730244    | 730244    | C   | T | SNP | KANK1            | silent              | c.2892    | p.L964                     | 84  | 1 | 1.1  | 43 | 40  | 47.62 |
| SCN02 | 4 | 8  | 23177505  | 23177505  | T   | G | SNP | LOXL2            | missense            | c.1363    | p.N455H                    | 135 | 0 | 0    | 37 | 25  | 39.06 |
| SCN03 | 1 | 15 | 83395628  | 83395628  | G   | A | SNP | LOC283693        | rna                 | NULL      | NULL                       | 57  | 0 | 0    | 33 | 17  | 34    |
| SCN03 | 1 | 4  | 90857914  | 90857914  | G   | A | SNP | MMRN1            | missense            | c.3083    | p.R1028Q                   | 73  | 0 | 0    | 17 | 24  | 58.54 |
| SCN03 | 1 | 14 | 72431527  | 72431527  | G   | T | SNP | RGS6             | missense            | c.19      | p.D7Y                      | 70  | 0 | 0    | 25 | 19  | 42.22 |
| SCN03 | 2 | 19 | 15807256  | 15807256  | G   | A | SNP | CYP4F12          | missense            | c.1331    | p.R444H                    | 54  | 0 | 0    | 16 | 25  | 60.98 |
| SCN03 | 2 | 2  | 232389899 | 232389899 | C   | T | SNP | NMUR1            | missense            | c.1136    | p.R379H                    | 74  | 0 | 0    | 47 | 29  | 38.16 |
| SCN03 | 3 | 11 | 130286861 | 130286861 | G   | A | SNP | ADAMTS8          | missense            | c.1070    | p.A357V                    | 79  | 1 | 1.19 | 51 | 55  | 50.93 |
| SCN03 | 3 | 2  | 27320515  | 27320515  | G   | A | SNP | KHK              | missense            | c.562     | p.V188M                    | 48  | 0 | 0    | 32 | 45  | 58.44 |
| SCN03 | 3 | 11 | 121448064 | 121448064 | G   | - | DEL | SORL1            | frame_shift<br>_del | c.3535    | p.D1180fs                  | 109 | 0 | 0    | 54 | 76  | 58.46 |
| SCN03 | 4 | 19 | 37618828  | 37618828  | G   | A | SNP | ZNF420           | missense            | c.935     | p.C312Y                    | 46  | 1 | 2.13 | 16 | 15  | 46.88 |
| SCN04 | 2 | 17 | 66915591  | 66915591  | G   | A | SNP | ABCA8            | missense            | c.1639    | p.L547F                    | 79  | 0 | 0    | 38 | 18  | 32.14 |
| SCN04 | 2 | 12 | 31249675  | 31249675  | T   | C | SNP | DDX11            | silent              | c.1626    | p.T542                     | 124 | 0 | 0    | 47 | 40  | 45.98 |
| SCN04 | 2 | 1  | 74507363  | 74507363  | G   | A | SNP | LRRIQ3           | nonsense            | c.1252    | p.R418*                    | 93  | 0 | 0    | 43 | 50  | 53.19 |
| SCN04 | 2 | 11 | 58207266  | 58207266  | C   | T | SNP | OR5B12           | missense            | c.359     | p.R120H                    | 97  | 0 | 0    | 57 | 46  | 44.66 |
| SCN04 | 2 | 1  | 153043246 | 153043246 | G   | A | SNP | SPRR2B           | missense            | c.70      | p.P24S                     | 74  | 0 | 0    | 54 | 30  | 35.29 |
| SCN04 | 2 | 1  | 47767942  | 47767942  | A   | G | SNP | STIL             | missense            | c.229     | p.S77P                     | 218 | 1 | 0.44 | 85 | 102 | 53.97 |
| SCN04 | 3 | 6  | 70866083  | 70866083  | G   | A | SNP | COL19A1          | missense            | c.2144    | p.G715D                    | 96  | 0 | 0    | 33 | 36  | 51.43 |
| SCN04 | 3 | 1  | 24484116  | 24484116  | G   | A | SNP | IFNLR1           | missense            | c.1067    | p.A356V                    | 72  | 0 | 0    | 33 | 26  | 42.62 |
| SCN04 | 3 | 20 | 44641940  | 44641940  | G   | A | SNP | MMP9             | silent              | c.1377    | p.P459                     | 111 | 0 | 0    | 38 | 27  | 40.3  |
| SCN05 | 1 | 19 | 18053472  | 18053474  | AGG | - | DEL | CCDC124          | in_frame_d<br>el    | c.167_169 | p.E57i<br>in_frame_<br>del | 63  | 1 | 1.56 | 94 | 83  | 46.89 |
| SCN05 | 1 | 11 | 66358159  | 66358159  | G   | C | SNP | CCDC87           | silent              | c.2328    | p.L776                     | 59  | 0 | 0    | 52 | 48  | 45.71 |
| SCN05 | 1 | 3  | 195609379 | 195609379 | G   | A | SNP | TNK2             | missense            | c.395     | p.A132V                    | 36  | 1 | 2.7  | 42 | 28  | 37.84 |
| SCN05 | 2 | 2  | 148672767 | 148672767 | G   | T | SNP | ACVR2A           | missense            | c.536     | p.G179V                    | 64  | 1 | 1.33 | 37 | 31  | 45.59 |
| SCN05 | 2 | 19 | 14006213  | 14006213  | C   | T | SNP | C19orf57         | missense            | c.178     | p.G60R                     | 67  | 2 | 2.6  | 46 | 43  | 48.31 |
| SCN05 | 3 | 19 | 9071998   | 9071998   | C   | T | SNP | MUC16            | missense            | c.15448   | p.A5150T                   | 31  | 0 | 0    | 23 | 26  | 52    |
| SCN05 | 3 | 1  | 233122144 | 233122144 | C   | G | SNP | PCNXL2           | missense            | c.5934    | p.Q1978H                   | 34  | 0 | 0    | 36 | 47  | 55.29 |
| SCN05 | 3 | 15 | 25448455  | 25448455  | C   | T | SNP | SNORD115-<br>18  | rna                 | NULL      | NULL                       | 52  | 0 | 0    | 73 | 61  | 44.85 |
| SCN05 | 4 | 1  | 201868546 | 201868546 | G   | A | SNP | LMOD1            | missense            | c.1595    | p.A532V                    | 92  | 0 | 0    | 61 | 60  | 49.59 |



|       |   |    |           |           |   |   |     |                 |             |        |          |     |   |      |     |     |       |
|-------|---|----|-----------|-----------|---|---|-----|-----------------|-------------|--------|----------|-----|---|------|-----|-----|-------|
| SCN05 | 4 | 6  | 76582975  | 76582975  | C | T | SNP | MYO6            | missense    | c.2035 | p.H679Y  | 74  | 0 | 0    | 60  | 47  | 43.52 |
| SCN05 | 4 | 8  | 71068901  | 71068901  | C | A | SNP | NCOA2           | splice_site | c.NULL | NULL     | 36  | 0 | 0    | 36  | 32  | 47.06 |
| SCN06 | 1 | 15 | 56665656  | 56665656  | T | C | SNP | TEX9            | missense    | c.137  | p.L46S   | 185 | 0 | 0    | 151 | 114 | 42.54 |
| SCN06 | 2 | 4  | 110788917 | 110788917 | G | A | SNP | LRIT3           | missense    | c.710  | p.R237H  | 92  | 0 | 0    | 38  | 42  | 50.6  |
| SCN06 | 2 | 8  | 57079060  | 57079060  | T | C | SNP | PLAG1           | silent      | c.1245 | p.A415   | 103 | 0 | 0    | 37  | 34  | 46.58 |
| SCN06 | 2 | 3  | 58351615  | 58351615  | A | C | SNP | PXK             | silent      | c.117  | p.R39    | 138 | 0 | 0    | 76  | 56  | 40.58 |
| SCN06 | 2 | 4  | 186544635 | 186544635 | G | A | SNP | SORBS2          | missense    | c.1936 | p.H646Y  | 38  | 0 | 0    | 12  | 10  | 45.45 |
| SCN06 | 2 | 4  | 183714508 | 183714508 | G | A | SNP | TENM3           | missense    | c.6683 | p.R2228H | 55  | 0 | 0    | 21  | 31  | 55.36 |
| SCN06 | 2 | 2  | 179641019 | 179641019 | C | T | SNP | TTN             | missense    | c.5572 | p.A1858T | 72  | 1 | 1.3  | 42  | 34  | 41.98 |
| SCN06 | 3 | 1  | 150621135 | 150621135 | T | C | SNP | GOLPH3L         | missense    | c.520  | p.T174A  | 49  | 0 | 0    | 25  | 33  | 53.23 |
| SCN06 | 3 | 20 | 61711352  | 61711352  | G | C | SNP | LOC63930        | rna         | NULL   | NULL     | 55  | 0 | 0    | 49  | 71  | 58.2  |
| SCN06 | 3 | 10 | 105331334 | 105331334 | C | T | SNP | NEURL           | missense    | c.404  | p.P135L  | 82  | 0 | 0    | 64  | 91  | 56.88 |
| SCN06 | 3 | 6  | 169629697 | 169629697 | G | A | SNP | THBS2           | silent      | c.2229 | p.D743   | 61  | 0 | 0    | 49  | 67  | 55.83 |
| SCN06 | 4 | 6  | 109854608 | 109854608 | C | T | SNP | AK9             | missense    | c.3416 | p.R1139H | 77  | 0 | 0    | 45  | 57  | 55.34 |
| SCN06 | 4 | 4  | 123664650 | 123664650 | G | A | SNP | BBS12           | missense    | c.1603 | p.V535I  | 61  | 0 | 0    | 24  | 32  | 57.14 |
| SCN06 | 4 | 4  | 2446991   | 2446991   | A | T | SNP | ENSG00000206113 | rna         | NULL   | NULL     | 167 | 0 | 0    | 127 | 95  | 42.04 |
| SCN06 | 4 | 1  | 62574141  | 62574141  | A | C | SNP | INADL           | missense    | c.4410 | p.E1470D | 122 | 0 | 0    | 88  | 71  | 44.38 |
| SCN06 | 4 | 14 | 65438790  | 65438790  | G | A | SNP | RAB15           | missense    | c.5    | p.A2V    | 68  | 1 | 1.39 | 55  | 50  | 47.17 |
| SCN06 | 4 | 9  | 125752384 | 125752384 | A | G | SNP | RABGAP1         | missense    | c.815  | p.K272R  | 87  | 1 | 1.06 | 59  | 42  | 40    |
| SCN06 | 4 | 3  | 77147316  | 77147316  | G | A | SNP | ROBO2           | silent      | c.213  | p.V71    | 56  | 0 | 0    | 37  | 29  | 43.94 |
| SCN06 | 4 | 22 | 24896172  | 24896172  | C | T | SNP | UPB1            | nonsense    | c.202  | p.R68*   | 42  | 0 | 0    | 27  | 27  | 50    |
| SCN06 | 4 | 3  | 44489660  | 44489660  | C | T | SNP | ZNF445          | silent      | c.1503 | p.A501   | 44  | 0 | 0    | 25  | 35  | 57.38 |
| SCN06 | 4 | 10 | 44112575  | 44112575  | G | C | SNP | ZNF485          | missense    | c.1084 | p.A362P  | 42  | 0 | 0    | 23  | 41  | 62.12 |
| SCN07 | 1 | 17 | 65014375  | 65014375  | G | A | SNP | CACNG4          | silent      | c.291  | p.S97    | 43  | 0 | 0    | 16  | 28  | 60.87 |
| SCN07 | 1 | 12 | 3131018   | 3131018   | G | A | SNP | TEAD4           | missense    | c.499  | p.A167T  | 57  | 0 | 0    | 31  | 31  | 47.69 |
| SCN07 | 2 | 1  | 110173061 | 110173061 | C | T | SNP | AMPD2           | nonsense    | c.2263 | p.R755*  | 55  | 0 | 0    | 19  | 19  | 50    |
| SCN07 | 3 | 17 | 48268769  | 48268769  | C | A | SNP | COL1A1          | missense    | c.2210 | p.G737V  | 70  | 0 | 0    | 56  | 49  | 46.23 |
| SCN07 | 3 | X  | 129205311 | 129205311 | C | A | SNP | ELF4            | missense    | c.616  | p.G206C  | 46  | 0 | 0    | 37  | 27  | 42.19 |
| SCN07 | 3 | 19 | 18572457  | 18572457  | C | G | SNP | ELL             | silent      | c.675  | p.L225   | 127 | 0 | 0    | 85  | 70  | 44.87 |
| SCN07 | 3 | X  | 135289344 | 135289344 | T | A | SNP | FHL1            | missense    | c.326  | p.V109E  | 31  | 0 | 0    | 19  | 18  | 48.65 |
| SCN07 | 3 | 16 | 29899008  | 29899008  | C | A | SNP | SEZ6L2          | missense    | c.185  | p.C62F   | 64  | 0 | 0    | 39  | 33  | 44.59 |
| SCN07 | 4 | 14 | 24898127  | 24898127  | C | A | SNP | CBLN3           | missense    | c.134  | p.C45F   | 76  | 0 | 0    | 27  | 28  | 48.28 |
| SCN07 | 4 | 10 | 7627894   | 7627894   | C | A | SNP | ITIH5           | missense    | c.1078 | p.V360L  | 116 | 0 | 0    | 72  | 42  | 35.59 |
| SCN07 | 4 | 10 | 74806764  | 74806764  | C | T | SNP | P4HA1           | nonsense    | c.996  | p.W332*  | 105 | 0 | 0    | 28  | 41  | 56.16 |
| SCN07 | 4 | 17 | 58259083  | 58259083  | C | T | SNP | USP32           | missense    | c.4150 | p.G1384R | 133 | 1 | 0.7  | 59  | 48  | 42.11 |
| SCN11 | 1 | 17 | 3336673   | 3336673   | C | T | SNP | OR1E2           | missense    | c.463  | p.A155T  | 111 | 0 | 0    | 39  | 49  | 55.68 |
| SCN11 | 1 | 19 | 43349207  | 43349207  | C | A | SNP | PSG10P          | rna         | NULL   | NULL     | 373 | 0 | 0    | 153 | 148 | 49.17 |
| SCN11 | 1 | 8  | 145096220 | 145096220 | G | A | SNP | SPATC1          | missense    | c.1394 | p.R465H  | 131 | 1 | 0.75 | 48  | 39  | 44.32 |
| SCN11 | 2 | 2  | 234160505 | 234160505 | C | T | SNP | ATG16L1         | missense    | c.32   | p.P11L   | 98  | 0 | 0    | 25  | 37  | 56.92 |
| SCN11 | 2 | 5  | 41904477  | 41904477  | C | T | SNP | C5orf51         | missense    | c.8    | p.A3V    | 141 | 0 | 0    | 56  | 46  | 43.4  |
| SCN11 | 2 | 9  | 108380266 | 108380266 | C | T | SNP | FKTN            | missense    | c.937  | p.P313S  | 111 | 1 | 0.88 | 93  | 83  | 46.63 |
| SCN11 | 2 | 12 | 70273192  | 70273192  | A | T | SNP | MYRFL           | silent      | c.423  | p.I141   | 87  | 0 | 0    | 43  | 37  | 45.68 |
| SCN11 | 2 | 8  | 144887433 | 144887433 | C | T | SNP | SCRIB           | missense    | c.2519 | p.R840Q  | 45  | 0 | 0    | 22  | 19  | 44.19 |
| SCN11 | 2 | 2  | 187703831 | 187703831 | G | A | SNP | ZSWIM2          | nonsense    | c.349  | p.Q117*  | 172 | 0 | 0    | 55  | 54  | 47.37 |

|       |   |    |           |           |                |   |     |          |                     |           |          |     |   |      |    |    |       |
|-------|---|----|-----------|-----------|----------------|---|-----|----------|---------------------|-----------|----------|-----|---|------|----|----|-------|
| SCN11 | 3 | 11 | 6578093   | 6578093   | C              | T | SNP | DNHD1    | missense            | c.7568    | p.T2523I | 40  | 0 | 0    | 11 | 18 | 62.07 |
| SCN11 | 3 | 7  | 123509187 | 123509187 | G              | T | SNP | HYAL4    | missense            | c.860     | p.R287M  | 112 | 0 | 0    | 54 | 57 | 51.35 |
| SCN11 | 3 | 8  | 42742870  | 42742870  | C              | G | SNP | RNF170   | splice_site         | c.137+1   | e1+1     | 116 | 0 | 0    | 72 | 64 | 47.06 |
| SCN11 | 4 | 3  | 119305233 | 119305233 | C              | A | SNP | ADPRH    | silent              | c.400     | p.R134   | 57  | 0 | 0    | 21 | 27 | 56.25 |
| SCN11 | 4 | 4  | 113362249 | 113362249 | A              | G | SNP | ALPK1    | missense            | c.3715    | p.M1239V | 106 | 0 | 0    | 34 | 52 | 60.47 |
| SCN11 | 4 | 11 | 2411735   | 2411735   | G              | A | SNP | CD81     | missense            | c.160     | p.A54T   | 44  | 0 | 0    | 24 | 13 | 35.14 |
| SCN11 | 4 | 10 | 22022938  | 22022938  | T              | C | SNP | MLLT10   | missense            | c.2738    | p.V913A  | 107 | 0 | 0    | 27 | 32 | 54.24 |
| SCN11 | 4 | 14 | 64989741  | 64989741  | A              | C | SNP | ZBTB1    | missense            | c.1519    | p.M507L  | 80  | 0 | 0    | 36 | 30 | 45.45 |
| SCN12 | 1 | 17 | 35578722  | 35578722  | G              | A | SNP | ACACA    | silent              | c.3606    | p.S1202  | 125 | 0 | 0    | 60 | 61 | 50    |
| SCN12 | 1 | 1  | 183084662 | 183084662 | A              | G | SNP | LAMC1    | silent              | c.1218    | p.L406   | 76  | 0 | 0    | 54 | 47 | 45.63 |
| SCN12 | 1 | 15 | 48427121  | 48427121  | C              | G | SNP | SLC24A5  | missense            | c.530     | p.A177G  | 85  | 0 | 0    | 42 | 35 | 44.87 |
| SCN12 | 1 | 10 | 123976384 | 123976384 | G              | A | SNP | TACC2    | silent              | c.327     | p.S109   | 53  | 0 | 0    | 32 | 33 | 50.77 |
| SCN12 | 2 | 17 | 58678206  | 58678206  | A              | G | SNP | PPM1D    | missense            | c.431     | p.K144R  | 40  | 0 | 0    | 51 | 31 | 36.05 |
| SCN12 | 2 | 14 | 94733300  | 94733300  | A              | T | SNP | PPP4R4   | missense            | c.2383    | p.S795C  | 103 | 0 | 0    | 99 | 84 | 43.75 |
| SCN12 | 2 | 9  | 112207555 | 112207555 | T              | A | SNP | PTPN3    | missense            | c.431     | p.N144I  | 68  | 0 | 0    | 75 | 75 | 48.39 |
| SCN12 | 2 | 11 | 67401832  | 67401832  | C              | T | SNP | TBX10    | splice_site         | c.378-1   | e4-1     | 113 | 0 | 0    | 68 | 79 | 51.63 |
| SCN12 | 3 | 9  | 72459533  | 72459533  | G              | C | SNP | C9orf135 | missense            | c.253     | p.E85Q   | 102 | 0 | 0    | 48 | 32 | 35.56 |
| SCN12 | 3 | 8  | 62212688  | 62212688  | G              | A | SNP | CLVS1    | missense            | c.302     | p.R101H  | 68  | 0 | 0    | 31 | 28 | 43.75 |
| SCN12 | 3 | 2  | 206605325 | 206605325 | G              | A | SNP | NRP2     | missense            | c.1229    | p.R410H  | 77  | 0 | 0    | 36 | 35 | 45.45 |
| SCN12 | 3 | 3  | 146171929 | 146171929 | C              | G | SNP | PLSCR2   | missense            | c.343     | p.G115R  | 70  | 0 | 0    | 24 | 36 | 60    |
| SCN12 | 3 | 7  | 38812163  | 38812163  | C              | T | SNP | VPS41    | missense            | c.1087    | p.D363N  | 65  | 0 | 0    | 31 | 30 | 43.48 |
| SCN12 | 4 | 19 | 51022148  | 51022148  | G              | A | SNP | LRRC4B   | silent              | c.822     | p.D274   | 84  | 0 | 0    | 78 | 52 | 39.69 |
| SCN12 | 4 | 17 | 40939796  | 40939796  | C              | T | SNP | WNK4     | missense            | c.1742    | p.S581L  | 59  | 0 | 0    | 47 | 33 | 41.25 |
| SCN13 | 1 | 7  | 92098567  | 92098567  | C              | A | SNP | ERVW-1   | missense            | c.1129    | p.A377S  | 45  | 1 | 2.08 | 24 | 8  | 22.86 |
| SCN13 | 1 | 12 | 31135513  | 31135513  | C              | T | SNP | TSPAN11  | missense            | c.503     | p.T168M  | 84  | 0 | 0    | 36 | 39 | 50    |
| SCN13 | 1 | 9  | 96000542  | 96000542  | G              | A | SNP | WNK2     | missense            | c.1261    | p.V421M  | 94  | 0 | 0    | 67 | 38 | 34.23 |
| SCN13 | 2 | 15 | 49716584  | 49716584  | A              | G | SNP | FGF7     | silent              | c.90      | p.L30    | 52  | 0 | 0    | 24 | 27 | 48.21 |
| SCN13 | 2 | 2  | 176996134 | 176996134 | A              | C | SNP | HOXD8    | missense            | c.667     | p.T223P  | 66  | 0 | 0    | 21 | 18 | 42.86 |
| SCN13 | 2 | 1  | 237732457 | 237732457 | C              | T | SNP | RYR2     | missense            | c.3430    | p.H1144Y | 104 | 0 | 0    | 40 | 35 | 43.21 |
| SCN13 | 3 | 11 | 26677951  | 26677951  | A              | G | SNP | ANO3     | missense            | c.2686    | p.S896G  | 48  | 0 | 0    | 40 | 46 | 52.27 |
| SCN13 | 3 | 20 | 20232324  | 20232324  | C              | T | SNP | C20orf26 | nonsense            | c.2245    | p.R749*  | 41  | 0 | 0    | 38 | 23 | 37.1  |
| SCN13 | 3 | 15 | 79229752  | 79229752  | T              | C | SNP | CTSH     | missense            | c.137     | p.Y46C   | 49  | 0 | 0    | 56 | 58 | 49.57 |
| SCN13 | 3 | 16 | 70690880  | 70690880  | C              | G | SNP | IL34     | missense            | c.258     | p.S86R   | 63  | 0 | 0    | 32 | 33 | 50.77 |
| SCN13 | 3 | 9  | 6007253   | 6007253   | A              | C | SNP | KIAA2026 | missense            | c.535     | p.S179A  | 42  | 0 | 0    | 12 | 18 | 60    |
| SCN22 | 1 | 2  | 220038190 | 220038190 | C              | T | SNP | CNPPD1   | splice_site         | c.573-1   | e7-1     | 55  | 0 | 0    | 3  | 9  | 75    |
| SCN22 | 1 | 2  | 165404193 | 165404193 | T              | C | SNP | GRB14    | missense            | c.458     | p.E153G  | 83  | 0 | 0    | 18 | 12 | 38.71 |
| SCN22 | 1 | 2  | 24297015  | 24297015  | G              | A | SNP | SF3B14   | missense            | c.80      | p.P27L   | 71  | 0 | 0    | 6  | 13 | 65    |
| SCN22 | 1 | 1  | 205890872 | 205890872 | G              | A | SNP | SLC26A9  | missense            | c.1877    | p.T626I  | 106 | 0 | 0    | 25 | 10 | 28.57 |
| SCN22 | 2 | 2  | 238243319 | 238243319 | C              | T | SNP | COL6A3   | missense            | c.9179    | p.C3060Y | 112 | 0 | 0    | 40 | 57 | 58.76 |
| SCN22 | 2 | 6  | 110110879 | 110110879 | G              | A | SNP | FIG4     | missense            | c.2179    | p.G727R  | 209 | 1 | 0.48 | 96 | 93 | 48.44 |
| SCN22 | 2 | 14 | 106641726 | 106641726 | C              | G | SNP | IGHV1-18 | missense            | c.188     | p.G63A   | 141 | 1 | 0.7  | 65 | 65 | 49.24 |
| SCN22 | 2 | 6  | 39282954  | 39282954  | T              | C | SNP | KCNK16   | silent              | c.915     | p.P305   | 163 | 1 | 0.61 | 57 | 55 | 48.25 |
| SCN22 | 2 | 1  | 169762650 | 169762650 | GTTCC<br>CACAA | - | DEL | METTL18  | frame_shift<br>_del | c.187_178 | p.L60fs  | 89  | 0 | 0    | 54 | 33 | 37.93 |

|       |   |    |           |           |   |   |     |          |          |         |           |     |   |      |    |     |       |
|-------|---|----|-----------|-----------|---|---|-----|----------|----------|---------|-----------|-----|---|------|----|-----|-------|
| SCN22 | 2 | 2  | 43973102  | 43973102  | G | A | SNP | PLEKHH2  | missense | c.3653  | p.R1218K  | 105 | 0 | 0    | 56 | 67  | 54.03 |
| SCN22 | 2 | 11 | 48166638  | 48166638  | G | A | SNP | PTPRJ    | missense | c.2873  | p.S958N   | 90  | 0 | 0    | 60 | 50  | 45.05 |
| SCN22 | 2 | 4  | 183710350 | 183710350 | G | A | SNP | TENM3    | silent   | c.5409  | p.T1803   | 85  | 2 | 2.22 | 46 | 46  | 50    |
| SCN22 | 2 | 19 | 38377660  | 38377660  | A | G | SNP | WDR87    | silent   | c.6651  | p.D2217   | 73  | 1 | 1.33 | 39 | 32  | 45.07 |
| SCN22 | 3 | 1  | 26517240  | 26517240  | G | A | SNP | CATSPER4 | missense | c.122   | p.R41H    | 52  | 0 | 0    | 24 | 22  | 47.83 |
| SCN22 | 3 | 20 | 61950462  | 61950462  | C | T | SNP | COL20A1  | missense | c.2716  | p.R906C   | 133 | 0 | 0    | 52 | 56  | 51.85 |
| SCN22 | 3 | 20 | 62198835  | 62198835  | C | G | SNP | HELZ2    | missense | c.1876  | p.D626H   | 111 | 0 | 0    | 37 | 30  | 44.78 |
| SCN22 | 3 | 16 | 84695191  | 84695191  | T | G | SNP | KLHL36   | missense | c.1303  | p.Y435D   | 68  | 0 | 0    | 30 | 42  | 58.33 |
| SCN22 | 3 | 6  | 51798909  | 51798909  | G | A | SNP | PKHD1    | silent   | c.6120  | p.H2040   | 63  | 0 | 0    | 18 | 15  | 45.45 |
| SCN22 | 3 | 12 | 130015716 | 130015716 | C | T | SNP | TMEM132D | missense | c.1003  | p.V335M   | 79  | 0 | 0    | 24 | 14  | 36.84 |
| SCN22 | 4 | 11 | 65319581  | 65319581  | T | G | SNP | LTBP3    | missense | c.1393  | p.T465P   | 71  | 0 | 0    | 25 | 24  | 48    |
| SCN22 | 4 | X  | 26235696  | 26235696  | T | C | SNP | MAGEB5   | missense | c.278   | p.F93S    | 59  | 0 | 0    | 27 | 27  | 50    |
| SCN22 | 4 | 15 | 52539658  | 52539658  | G | A | SNP | MYO5C    | silent   | c.1878  | p.S626    | 51  | 0 | 0    | 22 | 16  | 40    |
| SCN22 | 4 | 14 | 77697962  | 77697962  | G | A | SNP | TMEM63C  | missense | c.382   | p.D128N   | 75  | 0 | 0    | 35 | 41  | 52.56 |
| SCN22 | 4 | 6  | 142490776 | 142490776 | G | A | SNP | VTA1     | silent   | c.297   | p.L99     | 213 | 0 | 0    | 96 | 100 | 50.51 |
| SDS16 | 1 | 19 | 44832052  | 44832052  | C | G | SNP | ZFP112   | missense | c.2327  | p.S776T   | 142 | 0 | 0    | 91 | 90  | 49.7  |
| SDS16 | 1 | 2  | 179410354 | 179410354 | C | T | SNP | TTN      | nonsense | c.68864 | p.W22955* | 134 | 0 | 0    | 87 | 76  | 46.6  |
| SDS16 | 2 | 10 | 101985714 | 101985714 | C | T | SNP | CHUK     | missense | c.166   | p.E56K    | 51  | 0 | 0    | 22 | 29  | 56.9  |
| SDS16 | 3 | 12 | 7864241   | 7864241   | C | A | SNP | DPPA3    | missense | c.75    | p.D25E    | 104 | 0 | 0    | 52 | 50  | 49    |
| SDS35 | 1 | 9  | 990686    | 990686    | G | A | SNP | DMRT3    | missense | c.1100  | p.R367Q   | 182 | 0 | 0    | 79 | 60  | 43.2  |
| SDS35 | 2 | 1  | 117122352 | 117122352 | C | T | SNP | IGSF3    | missense | c.3056  | p.G1019E  | 124 | 0 | 0    | 53 | 47  | 47    |
| SDS35 | 2 | 16 | 56875711  | 56875711  | C | A | SNP | NUP93    | missense | c.2315  | p.S772Y   | 57  | 0 | 0    | 22 | 19  | 46.3  |
| SDS35 | 2 | 20 | 34089737  | 34089737  | A | G | SNP | CEP250   | missense | c.3964  | p.M1322V  | 32  | 0 | 0    | 15 | 17  | 53.1  |
| SDS35 | 2 | 3  | 119445086 | 119445086 | G | A | SNP | C3orf15  | missense | c.751   | p.E251K   | 41  | 0 | 0    | 19 | 18  | 48.6  |
| SDS35 | 3 | 8  | 135669924 | 135669924 | C | A | SNP | ZFAT     | nonsense | c.76    | p.E26*    | 41  | 0 | 0    | 19 | 30  | 61.2  |
| SDS35 | 4 | 1  | 158641152 | 158641152 | G | T | SNP | SPTA1    | missense | c.1580  | p.A527D   | 12  | 0 | 0    | 9  | 7   | 43.8  |
| SDS35 | 4 | 19 | 10247890  | 10247890  | C | T | SNP | DNMT1    | missense | c.4360  | p.D1454N  | 19  | 0 | 0    | 13 | 10  | 43.5  |
| SDS35 | 4 | 6  | 86351101  | 86351101  | A | T | SNP | SYNCRIP  | silent   | c.57    | p.S19     | 15  | 0 | 0    | 5  | 5   | 50    |

HPC: hematopoietic progenitor cell; Chr: chromosome; Ref: reference allele; Var: variant allele; VAF: variant allele frequency

Unfractionated bone marrow mononuclear cells (WBC) were sequenced and represent the "normal" sample to call somatic variants

**Table S5. Somatic variants associated with clonal hematopoiesis**

| Study ID | Chr | start     | stop      | Ref | Var | Gene          | Mutation type | cDNA position | amino acid change | Ref count | Variant count | VAF    | ExAC adj AF | Cosmic      |
|----------|-----|-----------|-----------|-----|-----|---------------|---------------|---------------|-------------------|-----------|---------------|--------|-------------|-------------|
| CN09     | 1   | 36932296  | 36932296  | G   | A   | <i>CSF3R</i>  | nonsense      | c.2173        | p.Q702*           | 3179      | 16            | 0.005  | 0           | COSM4219286 |
| CN09     | 1   | 36932209  | 36932209  | G   | A   | <i>CSF3R</i>  | nonsense      | c.2260        | p.Q731*           | 3162      | 22            | 0.0069 | 0           | COSM4173043 |
| CN09     | 1   | 36932281  | 36932281  | G   | A   | <i>CSF3R</i>  | nonsense      | c.2188        | p.Q707*           | 3171      | 38            | 0.0118 | 0           | COSM4172543 |
| CN09     | 1   | 36932254  | 36932254  | G   | A   | <i>CSF3R</i>  | nonsense      | c.2215        | p.Q716*           | 3004      | 59            | 0.0192 | 0           | COSM1168011 |
| CN09     | 12  | 25398281  | 25398281  | C   | T   | <i>KRAS</i>   | missense      | c.38          | p.G13D            | 1084      | 21            | 0.019  | 0           | COSM532     |
| CN10     | 6   | 43305245  | 43305245  | C   | A   | <i>ZNF318</i> | missense      | c.6491        | p.G2164V          | 693       | 3             | 0.0043 | 0           |             |
| CN14     | 2   | 198264986 | 198264986 | G   | T   | <i>SF3B1</i>  | missense      | c.2891        | p.T964N           | 1543      | 4             | 0.0026 | 0           |             |
| CN16     | X   | 129149759 | 129149759 | C   | A   | <i>BCORL1</i> | missense      | c.3011        | p.P1004H          | 1878      | 4             | 0.0021 | 0           |             |
| CN18     | 4   | 106164792 | 106164792 | C   | A   | <i>TET2</i>   | missense      | c.3569        | p.P1190H          | 2727      | 4             | 0.0015 | 0           |             |
| NM01     | 2   | 25470548  | 25470548  | C   | T   | <i>DNMT3A</i> | missense      | c.926         | p.R309H           | 637       | 32            | 0.0478 | 0           |             |
| NM14     | 11  | 64535613  | 64535613  | G   | A   | <i>SF1</i>    | missense      | c.1033        | p.R345C           | 2836      | 8             | 0.0028 | 0           | COSM1509537 |
| NM15     | 7   | 101892152 | 101892152 | C   | A   | <i>CUX1</i>   | missense      | c.4381        | p.P1461T          | 1955      | 4             | 0.002  | 0           |             |
| NM19     | 4   | 106180840 | 106180840 | T   | C   | <i>TET2</i>   | missense      | c.3868        | p.S1290P          | 4032      | 5             | 0.0012 | 0           | COSM4383924 |
| NM20     | 11  | 108165749 | 108165749 | T   | A   | <i>ATM</i>    | missense      | c.4872        | p.H1624Q          | 3819      | 4             | 0.001  | 0           |             |
| SCN01    | 1   | 36932213  | 36932213  | A   | C   | <i>CSF3R</i>  | nonsense      | c.2256        | p.Y729*           | 7199      | 111           | 0.0152 | 0           | COSM4172579 |
| SCN02    | 1   | 36932224  | 36932224  | G   | A   | <i>CSF3R</i>  | nonsense      | c.2245        | p.Q726*           | 6949      | 9             | 0.0013 | 0           | COSM1724982 |
| SCN02    | 1   | 36932213  | 36932213  | A   | T   | <i>CSF3R</i>  | nonsense      | c.2256        | p.Y729*           | 6917      | 50            | 0.0072 | 0           | COSM4172579 |
| SCN04    | X   | 76939445  | 76939445  | T   | C   | <i>ATRX</i>   | missense      | c.1303        | p.I435V           | 2878      | 5             | 0.0017 | 0.00018     |             |
| SCN04    | 1   | 36932224  | 36932224  | G   | A   | <i>CSF3R</i>  | nonsense      | c.2245        | p.Q726*           | 4163      | 10            | 0.0024 | 0           | COSM1724982 |
| SCN05    | 11  | 108181037 | 108181037 | G   | T   | <i>ATM</i>    | missense      | c.5913        | p.E1971D          | 1740      | 44            | 0.0247 | 0           |             |
| SCN05    | 1   | 36932224  | 36932224  | G   | A   | <i>CSF3R</i>  | nonsense      | c.2245        | p.Q726*           | 3622      | 13            | 0.0036 | 0           | COSM1724982 |
| SCN05    | 3   | 47163303  | 47163303  | C   | A   | <i>SETD2</i>  | missense      | c.2823        | p.K941N           | 2557      | 5             | 0.002  | 0           |             |
| SCN06    | 1   | 36932248  | 36932248  | G   | A   | <i>CSF3R</i>  | nonsense      | c.2221        | p.Q718*           | 1198      | 20            | 0.0164 | 0           | COSM4172565 |
| SCN07    | 1   | 36932242  | 36932242  | G   | A   | <i>CSF3R</i>  | nonsense      | c.2227        | p.Q720*           | 4284      | 290           | 0.0634 | 0           | COSM4172525 |
| SCN13    | 11  | 108205783 | 108205783 | A   | G   | <i>ATM</i>    | missense      | c.8098        | p.K2700E          | 2241      | 4             | 0.0018 | 0           |             |
| SCN14    | 1   | 36932248  | 36932248  | G   | A   | <i>CSF3R</i>  | nonsense      | c.2221        | p.Q718*           | 7231      | 19            | 0.0026 | 0           | COSM4172565 |
| SCN15    | 1   | 36932325  | 36932325  | G   | C   | <i>CSF3R</i>  | nonsense      | c.2144        | p.S692*           | 7879      | 11            | 0.0014 | 0           | COSM4340576 |
| SCN15    | 1   | 36932248  | 36932248  | G   | A   | <i>CSF3R</i>  | nonsense      | c.2221        | p.Q718*           | 8271      | 1410          | 0.1456 | 0           | COSM4172565 |
| SCN22    | 20  | 31023667  | 31023667  | G   | A   | <i>ASXL1</i>  | missense      | c.3152        | p.R1051H          | 1429      | 6             | 0.0042 | 8.1E-06     | COSM5486129 |
| SCN22    | 8   | 117870603 | 117870603 | C   | A   | <i>RAD21</i>  | nonsense      | c.469         | p.E157*           | 870       | 252           | 0.2246 | 0           |             |
| SCN24    | 1   | 36932248  | 36932248  | G   | A   | <i>CSF3R</i>  | nonsense      | c.2221        | p.Q718*           | 4723      | 204           | 0.0414 | 0           | COSM4172565 |
| SCN24    | 1   | 36932209  | 36932209  | G   | A   | <i>CSF3R</i>  | nonsense      | c.2260        | p.Q731*           | 4884      | 43            | 0.0087 | 0           | COSM4173043 |
| SCN26    | 7   | 101848448 | 101848448 | C   | T   | <i>CUX1</i>   | missense      | c.3161        | p.S1054L          | 3033      | 188           | 0.0584 | 0.00086     |             |
| SCN27    | 11  | 108137904 | 108137904 | T   | G   | <i>ATM</i>    | missense      | c.2473        | p.F825V           | 815       | 6             | 0.0073 | 0           |             |
| SCN28    | 11  | 108137904 | 108137904 | T   | G   | <i>ATM</i>    | missense      | c.2473        | p.F825V           | 1794      | 6             | 0.0033 | 0           |             |
| SCN36    | 1   | 36932248  | 36932248  | G   | A   | <i>CSF3R</i>  | nonsense      | c.2221        | p.Q718*           | 5253      | 23            | 0.0044 | 0           | COSM4172565 |
| SCN38    | 2   | 198288636 | 198288636 | C   | A   | <i>SF3B1</i>  | missense      | c.91          | p.V31L            | 1352      | 4             | 0.0029 | 0           |             |

|       |    |           |           |   |   |               |             |          |          |      |      |        |         |                   |
|-------|----|-----------|-----------|---|---|---------------|-------------|----------|----------|------|------|--------|---------|-------------------|
| SCN39 | 2  | 25505399  | 25505399  | C | A | <i>DNMT3A</i> | missense    | c.359    | p.G120V  | 2860 | 5    | 0.0017 | 0       |                   |
| SCN39 | 12 | 112926951 | 112926951 | C | A | <i>PTPN11</i> | missense    | c.1571   | p.T524K  | 830  | 4    | 0.0048 | 0       |                   |
| SCN42 | 1  | 36932209  | 36932209  | G | A | <i>CSF3R</i>  | nonsense    | c.2260   | p.Q731*  | 3698 | 102  | 0.0268 | 0       | COSM4173043       |
| SCN45 | 12 | 25398281  | 25398281  | C | T | <i>KRAS</i>   | missense    | c.38     | p.G13D   | 939  | 4    | 0.0042 | 0       | COSM532           |
| SCN47 | 12 | 112926884 | 112926884 | T | G | <i>PTPN11</i> | missense    | c.1504   | p.S502A  | 3418 | 4    | 0.0012 | 0       | COSM20901         |
| SCN48 | 1  | 36932248  | 36932248  | G | A | <i>CSF3R</i>  | nonsense    | c.2221   | p.Q718*  | 4620 | 6    | 0.0013 | 0       | COSM4172565       |
| SCN48 | 1  | 36932224  | 36932224  | G | A | <i>CSF3R</i>  | nonsense    | c.2245   | p.Q726*  | 4688 | 12   | 0.0026 | 0       | COSM1724982       |
| SCN48 | 1  | 36932209  | 36932209  | G | A | <i>CSF3R</i>  | nonsense    | c.2260   | p.Q731*  | 4559 | 10   | 0.0022 | 0       | COSM4173043       |
| SCN48 | 20 | 57430276  | 57430276  | C | A | <i>GNAS</i>   | missense    | c.1766   | p.P589H  | 2568 | 4    | 0.0016 | 0       |                   |
| SCN48 | 12 | 112915455 | 112915455 | T | C | <i>PTPN11</i> | missense    | c.854    | p.F285S  | 1511 | 19   | 0.0124 | 0       | COSM5424306       |
| SCN50 | 1  | 36932224  | 36932224  | G | A | <i>CSF3R</i>  | nonsense    | c.2245   | p.Q726*  | 6601 | 419  | 0.0597 | 0       | COSM1724982       |
| SCN51 | 20 | 31022589  | 31022589  | C | T | <i>ASXL1</i>  | nonsense    | c.2074   | p.Q692*  | 2554 | 44   | 0.0169 | 0       | COSM1155830       |
| SCN51 | 1  | 36932248  | 36932248  | G | A | <i>CSF3R</i>  | nonsense    | c.2221   | p.Q718*  | 3428 | 7    | 0.002  | 0       | COSM4172565       |
| SCN51 | 1  | 36932242  | 36932242  | G | A | <i>CSF3R</i>  | nonsense    | c.2227   | p.Q720*  | 2090 | 1338 | 0.3903 | 0       | COSM4172525       |
| SCN51 | 2  | 25462018  | 25462018  | T | C | <i>DNMT3A</i> | missense    | c.2389   | p.N797D  | 7497 | 202  | 0.0262 | 0       | COSM5878752       |
| SCN52 | 1  | 36932248  | 36932248  | G | A | <i>CSF3R</i>  | nonsense    | c.2221   | p.Q718*  | 2753 | 717  | 0.2066 | 0       | COSM4172565       |
| SCN53 | 1  | 36932209  | 36932209  | G | A | <i>CSF3R</i>  | nonsense    | c.2260   | p.Q731*  | 3025 | 72   | 0.0232 | 0       | COSM4173043       |
| SDS05 | 2  | 25457290  | 25457290  | C | G | <i>DNMT3A</i> | splice_site | c.2598-1 | e22-1    | 1986 | 8    | 0.004  | 8.3E-06 |                   |
| SDS05 | 1  | 115256445 | 115256445 | G | A | <i>NRAS</i>   | missense    | c.266    | p.S89L   | 3420 | 15   | 0.0044 | 0       |                   |
| SDS05 | 16 | 30745826  | 30745826  | C | T | <i>SRCAP</i>  | nonsense    | c.6619   | p.R2207* | 6900 | 28   | 0.004  | 0       |                   |
| SDS05 | 17 | 7578479   | 7578479   | G | A | <i>TP53</i>   | missense    | c.451    | p.P151S  | 3127 | 12   | 0.0038 | 0       | COSM10905         |
| SDS05 | 17 | 7578406   | 7578406   | C | T | <i>TP53</i>   | missense    | c.524    | p.R175H  | 4898 | 9    | 0.0018 | 8.1E-06 | COSM10648         |
| SDS05 | 17 | 7578403   | 7578403   | C | T | <i>TP53</i>   | missense    | c.527    | p.C176Y  | 4862 | 45   | 0.0092 | 8.1E-06 | COSM10687         |
| SDS05 | 17 | 7578394   | 7578394   | T | C | <i>TP53</i>   | missense    | c.536    | p.H179R  | 5020 | 30   | 0.0059 | 0       | COSM10889         |
| SDS05 | 17 | 7577544   | 7577544   | A | T | <i>TP53</i>   | missense    | c.737    | p.M246K  | 7325 | 4    | 0.0005 | 0       | COSM44103         |
| SDS06 | 17 | 7578404   | 7578404   | A | T | <i>TP53</i>   | missense    | c.526    | p.C176S  | 2846 | 7    | 0.0025 | 0       | COSM44146         |
| SDS06 | 17 | 7578271   | 7578271   | T | C | <i>TP53</i>   | missense    | c.578    | p.H193R  | 2879 | 10   | 0.0035 | 0       | COSM10742         |
| SDS06 | 17 | 7578190   | 7578190   | T | C | <i>TP53</i>   | missense    | c.659    | p.Y220C  | 2781 | 5    | 0.0018 | 2.5E-05 | COSM10758         |
| SDS06 | 17 | 7577568   | 7577568   | C | A | <i>TP53</i>   | missense    | c.713    | p.C238F  | 3623 | 11   | 0.003  | 0       | COSM43778         |
| SDS07 | 16 | 3786748   | 3786748   | G | A | <i>CREBBP</i> | missense    | c.4463   | p.P1488L | 3463 | 13   | 0.0037 | 0       | COSM3356828       |
| SDS07 | 17 | 7579350   | 7579350   | A | C | <i>TP53</i>   | missense    | c.337    | p.F113V  | 5242 | 76   | 0.0143 | 0       | COSM11498         |
| SDS07 | 17 | 7578190   | 7578190   | T | C | <i>TP53</i>   | missense    | c.659    | p.Y220C  | 4659 | 9    | 0.0019 | 2.5E-05 | COSM10758         |
| SDS08 | 7  | 148515059 | 148515059 | C | A | <i>EZH2</i>   | missense    | c.1150   | p.D384Y  | 2196 | 4    | 0.0018 | 0       |                   |
| SDS08 | 17 | 7577580   | 7577580   | T | C | <i>TP53</i>   | missense    | c.701    | p.Y234C  | 5398 | 3    | 0.0006 | 8.1E-06 | COSM10725         |
| SDS09 | 16 | 30732222  | 30732222  | C | T | <i>SRCAP</i>  | missense    | c.3176   | p.P1059L | 700  | 5    | 0.0071 | 0.00013 |                   |
| SDS11 | 16 | 30732222  | 30732222  | C | T | <i>SRCAP</i>  | missense    | c.3176   | p.P1059L | 873  | 7    | 0.008  | 0.00013 |                   |
| SDS13 | 17 | 7573009   | 7573009   | C | T | <i>TP53</i>   | splice_site | c.1101-1 | e10-1    | 2049 | 15   | 0.0073 | 0       | likely pathogenic |
| SDS13 | 17 | 7578532   | 7578532   | A | T | <i>TP53</i>   | missense    | c.398    | p.M133K  | 1400 | 19   | 0.0134 | 0       | COSM11781         |
| SDS13 | 17 | 7577539   | 7577539   | G | A | <i>TP53</i>   | missense    | c.742    | p.R248W  | 1683 | 6    | 0.0036 | 8.1E-06 | COSM6545          |
| SDS15 | X  | 76939445  | 76939445  | T | C | <i>ATRX</i>   | missense    | c.1303   | p.I435V  | 2867 | 5    | 0.0017 | 0.00018 |                   |
| SDS15 | 17 | 7577538   | 7577538   | C | T | <i>TP53</i>   | missense    | c.743    | p.R248Q  | 7691 | 8    | 0.001  | 5.7E-05 | COSM10662         |

|       |    |          |          |   |   |              |             |          |         |      |     |        |         |                   |
|-------|----|----------|----------|---|---|--------------|-------------|----------|---------|------|-----|--------|---------|-------------------|
| SDS19 | 17 | 7578478  | 7578478  | G | T | <i>TP53</i>  | missense    | c.452    | p.P151H | 1464 | 33  | 0.022  | 0       | COSM11476         |
| SDS19 | 17 | 7578203  | 7578203  | C | T | <i>TP53</i>  | missense    | c.646    | p.V216M | 3818 | 6   | 0.0016 | 0       | COSM10667         |
| SDS19 | 17 | 7577550  | 7577550  | C | A | <i>TP53</i>  | missense    | c.731    | p.G244V | 2591 | 104 | 0.0386 | 0       | COSM43652         |
| SDS21 | 15 | 90645507 | 90645507 | C | A | <i>IDH2</i>  | splice_site | c.115+1  | e1+1    | 2536 | 5   | 0.002  | 0       |                   |
| SDS22 | 17 | 7578393  | 7578393  | A | T | <i>TP53</i>  | missense    | c.537    | p.H179Q | 3748 | 31  | 0.0082 | 0       | COSM44214         |
| SDS25 | 13 | 28602366 | 28602366 | G | T | <i>FLT3</i>  | missense    | c.2002   | p.L668M | 693  | 56  | 0.0748 | 8.2E-06 |                   |
| SDS25 | 17 | 7578394  | 7578394  | T | C | <i>TP53</i>  | missense    | c.536    | p.H179R | 1321 | 5   | 0.0038 | 0       | COSM10889         |
| SDS31 | X  | 53426564 | 53426564 | T | C | <i>SMC1A</i> | missense    | c.2509   | p.M837V | 1690 | 7   | 0.0041 | 0       |                   |
| SDS31 | 17 | 7573009  | 7573009  | C | T | <i>TP53</i>  | splice_site | c.1101-1 | e10-1   | 3066 | 88  | 0.0279 | 0       | likely pathogenic |
| SDS31 | 17 | 7579310  | 7579310  | A | C | <i>TP53</i>  | splice_site | c.375+2  | e3+2    | 1522 | 7   | 0.0046 | 0       | COSM46043         |
| SDS31 | 17 | 7578532  | 7578532  | A | T | <i>TP53</i>  | missense    | c.398    | p.M133K | 1630 | 50  | 0.0298 | 0       | COSM11781         |
| SDS31 | 17 | 7578395  | 7578395  | G | A | <i>TP53</i>  | missense    | c.535    | p.H179Y | 2398 | 15  | 0.0062 | 0       | COSM10768         |
| SDS31 | 17 | 7577610  | 7577610  | T | C | <i>TP53</i>  | splice_site | c.673-2  | e6-2    | 2129 | 3   | 0.0014 | 0       | COSM25225         |
| SDS31 | 17 | 7577574  | 7577574  | T | C | <i>TP53</i>  | missense    | c.707    | p.Y236C | 3234 | 4   | 0.0012 | 0       | COSM10731         |
| SDS31 | 17 | 7577539  | 7577539  | G | A | <i>TP53</i>  | missense    | c.742    | p.R248W | 2606 | 16  | 0.0061 | 8.1E-06 | COSM6545          |
| SDS31 | 17 | 7577511  | 7577511  | A | T | <i>TP53</i>  | missense    | c.770    | p.L257Q | 3637 | 6   | 0.0016 | 0       | COSM43530         |
| SDS32 | 17 | 7577094  | 7577094  | G | A | <i>TP53</i>  | missense    | c.844    | p.R282W | 2762 | 88  | 0.0309 | 1.6E-05 | COSM10704         |
| SDS33 | 17 | 7578406  | 7578406  | C | T | <i>TP53</i>  | missense    | c.524    | p.R175H | 9016 | 12  | 0.0013 | 8.1E-06 | COSM10648         |
| SDS33 | 17 | 7577610  | 7577610  | T | C | <i>TP53</i>  | splice_site | c.673-2  | e6-2    | 5707 | 7   | 0.0012 | 0       | COSM25225         |
| SDS33 | 17 | 7577580  | 7577580  | T | C | <i>TP53</i>  | missense    | c.701    | p.Y234C | 6529 | 14  | 0.0021 | 8.1E-06 | COSM10725         |
| SDS34 | 17 | 7577538  | 7577538  | C | T | <i>TP53</i>  | missense    | c.743    | p.R248Q | 3909 | 130 | 0.0322 | 5.7E-05 | COSM10662         |

Chr: chromosome; Ref: reference; Var: variant; VAF: variant allele frequency

ExAC adj AF: Exome Aggregation Consortium adjusted allele frequency (<http://exac.broadinstitute.org>)

Cosmic: Shown is the identification number (if present) in the Catalogue of somatic mutations in cancer (COSMIC) database (<http://cancer.sanger.ac.uk/cosmic>)

For *CSF3R*, transcript *CSF3R-205* (ENT00000373106.5) was used to align mutations. Per convention, the 23 amino acid signal peptide was removed to generate the final amino acid position of the mutation

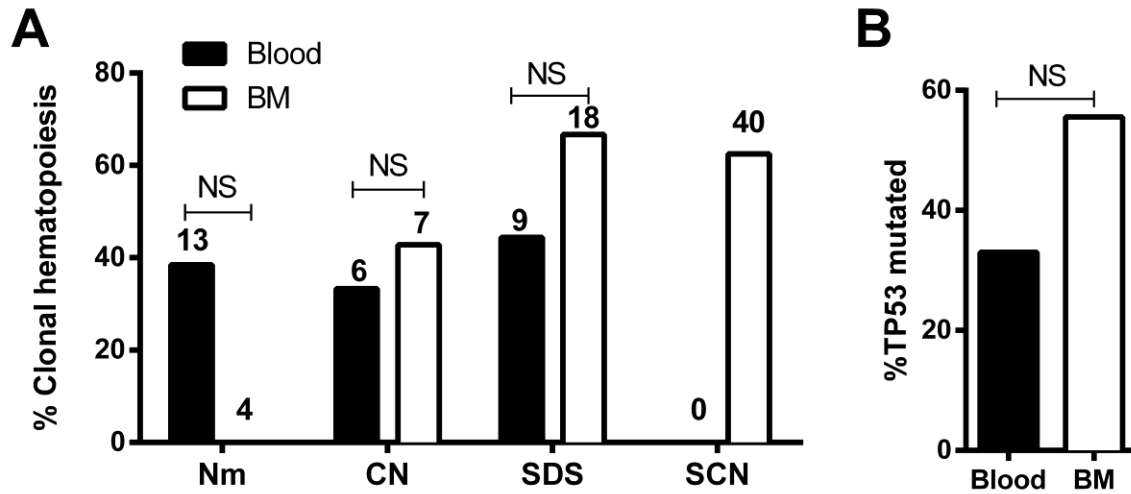

**Figure S1 Tissue origin has no consistent effect on the prevalence of clonal hematopoiesis.** (A) The percentage of cases with clonal hematopoiesis due to any mutation is shown based on whether a blood or bone marrow sample was analyzed. The numbers above the bars indicate the number of patients analyzed. All of the SCN samples were from the bone marrow. Nm: healthy donors; CN: cyclic neutropenia; SDS: Shwachman Diamond syndrome; and SCN: severe congenital neutropenia. (B) Percentage of patients with SDS who had one or more *TP53* mutation is shown.
